# Supplementary material for: Systemic juvenile idiopathic arthritis: The Great Ormond Street Hospital experience (2005–2021)
Source: PubMed Central journal article supplement (PMC10536248; doi:10.3389/fped.2023.1218312), 2023-09-12
Supplement: Datasheet1.pdf [file Datasheet1.pdf]

## Supplementary Figure 1: Systemic Manifestation Score (SMS)

| Clinical Manifestation                                            | Points |
|-------------------------------------------------------------------|--------|
| Fever                                                             |        |
| • 37 – 38 °C                                                      | 1      |
| • 38 – 39 °C                                                      | 2      |
| • 39 – 40 °C                                                      | 3      |
| • > 40 °C                                                         | 4      |
| Evanescient erythematous rash                                     | 1      |
| Generalised lymphadenopathy                                       | 1      |
| Hepatomegaly and / or splenomegaly                                | 1      |
| Serositis                                                         | 1      |
| Anaemia (Haemoglobin < 9 g/dL)                                    | 1      |
| Platelet count > 600 x 10 <sup>9</sup> /L or Ferritin > 500 ng/mL | 1      |

Supplementary Figure 2

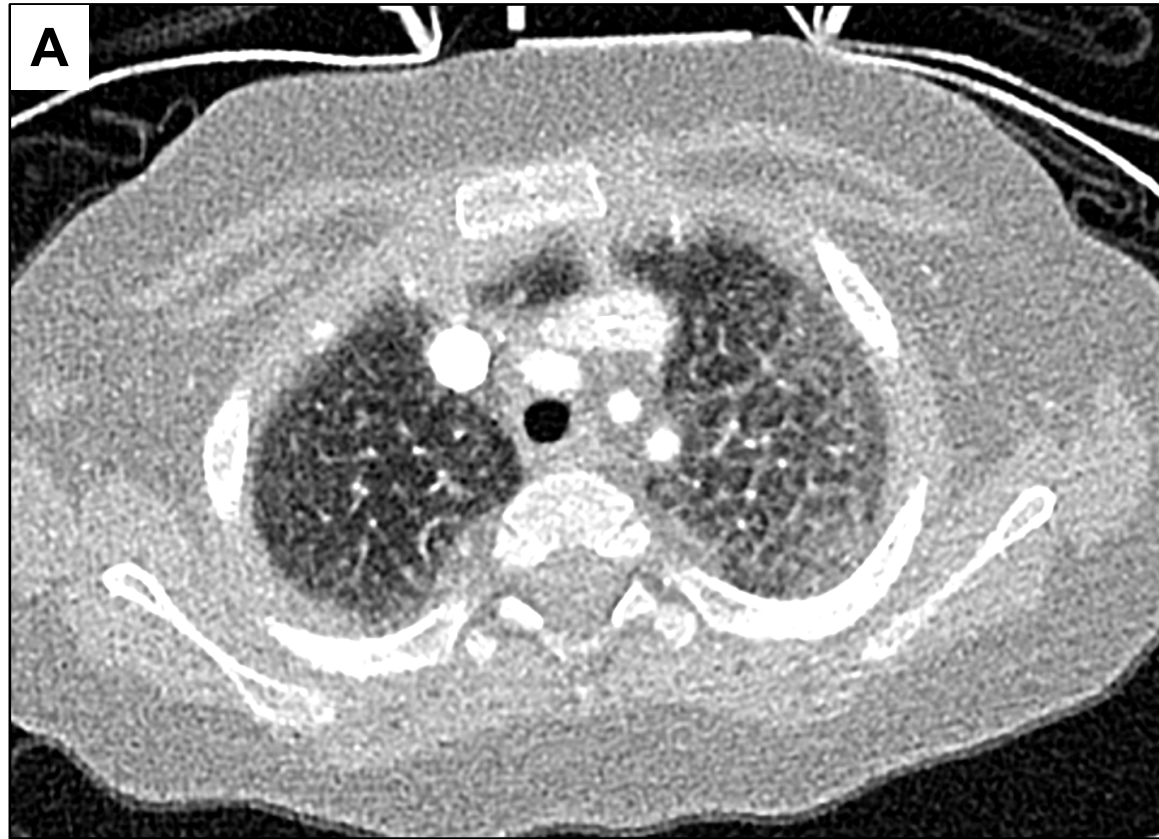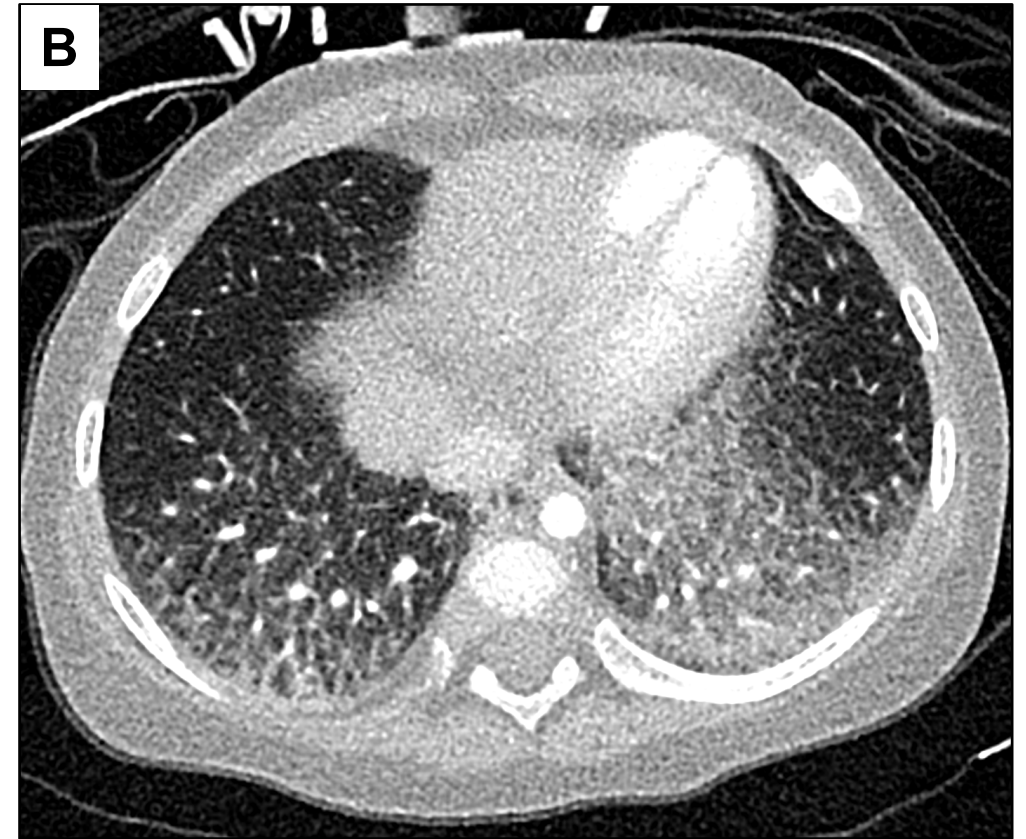

**High resolution CT (HRCT) thorax with contrast depicting pulmonary alveolar proteinosis in a 17-month-old child with systemic juvenile idiopathic arthritis and chronic (smouldering) macrophage activation syndrome.** (A) Diffuse widespread ground glass opacities with superimposed smooth interlobular septal thickening giving a typical "crazy paving pattern" appearance, characteristically seen in pulmonary alveolar proteinosis. (B) Left lower lobe consolidation with smooth interlobular septal thickening in the bases.
