# Supplementary material for: Systemic juvenile idiopathic arthritis: The Great Ormond Street Hospital experience (2005–2021)
Source: PubMed Central journal article supplement (PMC10536248; doi:10.3389/fped.2023.1218312), 2023-09-12
Supplement: Table1.pdf [file Table1.pdf]

**Supplementary table 1:** Tocilizumab dosing regimen used for all patients receiving Tocilizumab

|                                    | <b>Patient weight</b> | <b>sJIA / MAS</b>                                           | <b>pJIA</b>                                                  | <b>TA / Vasculitis</b>                                         |
|------------------------------------|-----------------------|-------------------------------------------------------------|--------------------------------------------------------------|----------------------------------------------------------------|
| Intravenous <sup>1</sup><br>route  | <b>&lt; 30kg</b>      | 12mg/kg<br>every 2 weeks                                    | 10mg/kg<br>every 4 weeks                                     | 12mg/kg<br>every 2-4 weeks                                     |
|                                    | <b>≥ 30kg</b>         | 8mg/kg<br>(max. 800mg)<br>every 2 weeks                     | 8mg/kg<br>(max. 800mg)<br>every 4 weeks                      | 8mg/kg<br>(max. 800mg)<br>every 2-4 weeks                      |
| Subcutaneous <sup>2</sup><br>route | <b>&lt; 30kg</b>      | 162mg<br>every 2 weeks<br>(patients ≥ 1 year<br>and ≥ 10kg) | 162mg<br>every 3 weeks<br>(patients ≥ 2<br>years and ≥ 10kg) | 162mg<br>every 2-3 weeks<br>(patients ≥ 2 years<br>and ≥ 10kg) |
|                                    | <b>≥ 30kg</b>         | 162mg<br>weekly                                             | 162mg<br>every 2 weeks                                       | 162mg<br>every 1-2 weeks                                       |

1. Summary of Product Characteristics –RoActemra 20mg/ml Concentrated Solution for Infusion. Roche Products Ltd. Accessed via <https://www.medicines.org.uk/emc>
2. Summary of Product Characteristics –RoActemra 162mg Solution for Injection Pre-filled syringe. Roche Products Ltd. Accessed via <https://www.medicines.org.uk/emc/>

sJIA, systemic juvenile idiopathic arthritis; MAS, Macrophage Activation Syndrome; pJIA, polyarticular juvenile idiopathic arthritis; TA, Takayasu Arteritis

**Supplementary table 2:** Bivariate analysis of outcome (clinically inactive disease at 3 months) in those with or without macrophage activation syndrome at presentation.

**Fisher's exact test p= 0.6288**

|                                         | <b>CID at 3 months</b> | <b>No CID at 3 months</b> | <b>Total</b> |
|-----------------------------------------|------------------------|---------------------------|--------------|
| <b>Suspected MAS at presentation</b>    | 17                     | 10                        | <b>27</b>    |
| <b>No suspected MAS at presentation</b> | 27                     | 22                        | <b>49</b>    |
| <b>Total</b>                            | <b>44</b>              | <b>32</b>                 | <b>76</b>    |

**Supplementary table 3:** Bivariate analysis of outcome (clinically inactive disease at 12 months) in those with or without macrophage activation syndrome at presentation.

**Fisher's exact test p= 0.1455**

|                                         | <b>CID at 12 months</b> | <b>No CID at 12 months</b> | <b>Total</b> |
|-----------------------------------------|-------------------------|----------------------------|--------------|
| <b>Suspected MAS at presentation</b>    | 19                      | 8                          | <b>27</b>    |
| <b>No suspected MAS at presentation</b> | 25                      | 24                         | <b>49</b>    |
| <b>Total</b>                            | <b>44</b>               | <b>32</b>                  | <b>76</b>    |

**Supplementary table 4:** Bivariate analysis of outcome (clinically inactive disease at last review) in those with or without macrophage activation syndrome at presentation.

**Fisher's exact test p= 1.0**

|                                         | <b>CID at last review</b> | <b>No CID at last review</b> | <b>Total</b> |
|-----------------------------------------|---------------------------|------------------------------|--------------|
| <b>Suspected MAS at presentation</b>    | 24                        | 3                            | <b>27</b>    |
| <b>No suspected MAS at presentation</b> | 43                        | 6                            | <b>49</b>    |
| <b>Total</b>                            | <b>67</b>                 | <b>9</b>                     | <b>76</b>    |
